# Supplementary material
Source: publisher figshare collection journal article supplement (https://tandf.figshare.com/ndownloader/files/12940298)
Supplement: Supplementary file 1 [file 12940298]

# Supplementary Table

**Supplementary Table 1.** Species included in each panel of the five panels (a-e) in Fig. 2. Data sources for each panel are provided in the manuscript

| Species | Panel a | Panel b | Panel c | Panel d | Panel e |
| --- | --- | --- | --- | --- | --- |
| *Abies balsamea* | ✔ |  |  |  |  |
| *Abies concolor* | ✔ |  |  | ✔ |  |
| *Abies grandis* | ✔ |  |  | ✔ |  |
| *Abies lasiocarpa* | ✔ |  |  | ✔ |  |
| *Calocedrus decurrens* | ✔ |  |  |  |  |
| *Cedrus deodara* | ✔ |  |  |  |  |
| *Chamaecyparis lawsoniana* | ✔ |  |  | ✔ |  |
| *Cryptomeria japonica* | ✔ |  |  |  |  |
| *Juniperus communis* | ✔ |  |  |  |  |
| *Juniperus monosperma* | ✔ |  |  |  |  |
| *Juniperus occidentalis* | ✔ |  |  | ✔ |  |
| *Juniperus osteosperma* | ✔ |  |  | ✔ |  |
| *Juniperus virginiana* | ✔ |  |  |  |  |
| *Larix decidua* | ✔ |  |  |  |  |
| *Larix kaempferi* | ✔ |  |  |  |  |
| *Larix occidentalis* | ✔ |  |  | ✔ |  |
| *Metasequoia glyptostroboides* | ✔ |  |  |  |  |
| *Picea abies* | ✔ |  |  |  |  |
| *Picea engelmannii* | ✔ |  |  | ✔ |  |
| *Picea glauca* | ✔ |  |  |  |  |
| *Picea mariana* | ✔ |  |  |  |  |
| *Picea rubens* | ✔ |  |  |  |  |
| *Picea sitchensis* | ✔ |  |  |  |  |
| *Pinus albicaulis* | ✔ |  |  | ✔ |  |
| *Pinus contorta* | ✔ |  |  | ✔ |  |
| *Pinus echinata* | ✔ |  |  | ✔ |  |
| *Pinus edulis* | ✔ |  |  | ✔ |  |
| *Pinus flexilis* | ✔ |  |  | ✔ |  |
| *Pinus halepensis* |  | ✔ | ✔ |  |  |
| *Pinus monophylla* | ✔ |  |  | ✔ |  |
| *Pinus mugo* | ✔ |  |  |  |  |
| *Pinus nigra* | ✔ | ✔ | ✔ |  |  |
| *Pinus pinaster* |  | ✔ | ✔ |  | ✔1 |
| *Pinus pinea* |  | ✔ | ✔ |  |  |
| *Pinus ponderosa* | ✔ |  |  | ✔ |  |
| *Pinus sylvestris* | ✔ | ✔ | ✔ |  |  |
| *Pinus uncinata* |  | ✔ | ✔ |  |  |
| *Pinus taeda* | ✔ |  |  |  |  |
| *Sequoia sempervirens* | ✔ |  |  | ✔ |  |
| *Sequoiadendron giganteum* | ✔ |  |  | ✔ |  |
| *Taxodium distichum* | ✔ |  |  |  |  |
| *Taxus brevifolia* | ✔ |  |  | ✔ |  |
| *Thuja occidentalis* | ✔ |  |  |  |  |
| *Thuja plicata* | ✔ |  |  | ✔ |  |
| *Tsuga canadensis* | ✔ |  |  | ✔ |  |

1 Six provenances of *Pinus pinaster* as follows: Arenas de San Pedro (Spain), Pleucadec (France), Mimizan (France), Oria (Spain), San Cipriano (Spain), Tamrabta (Morocco)
